# Supplementary material for: A low-energy-consumption electroactive valveless hydrogel micropump for long-term biomedical applications
Source: Royal Society of Chemistry journal article supplement (doi:10.1039/c1lc20288j), 2011-01-01

## Supplementary Information

Fig. S1. Microfabrication of the microfluidic device. (a) Soft lithography process, and (b) assembly of the electroactive hydrogel pump. The pump consists of four parts: PDMS channel, EAP hydrogel, silver wires, and coverslip.

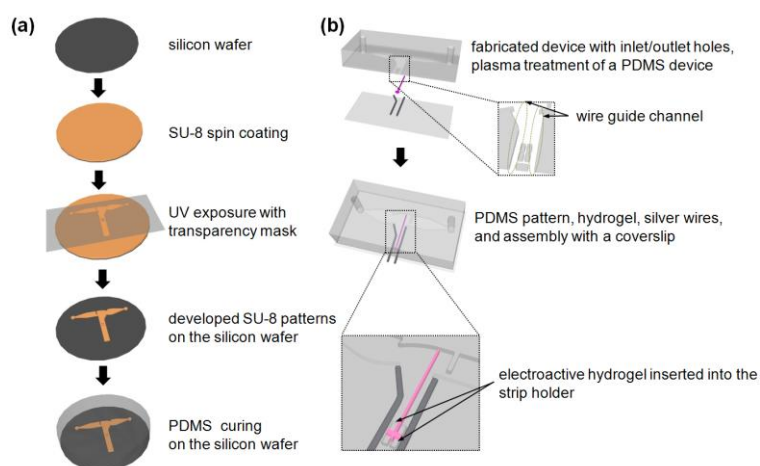

Fig. S2. (a) Method of measuring the micropump power consumption. We used a very small resistance, ( $R_1$ : 267  $\Omega$ ); therefore  $R_1$  did not affect the current profile. (b) Long-term operation test with a standard AA 1.5 V battery.

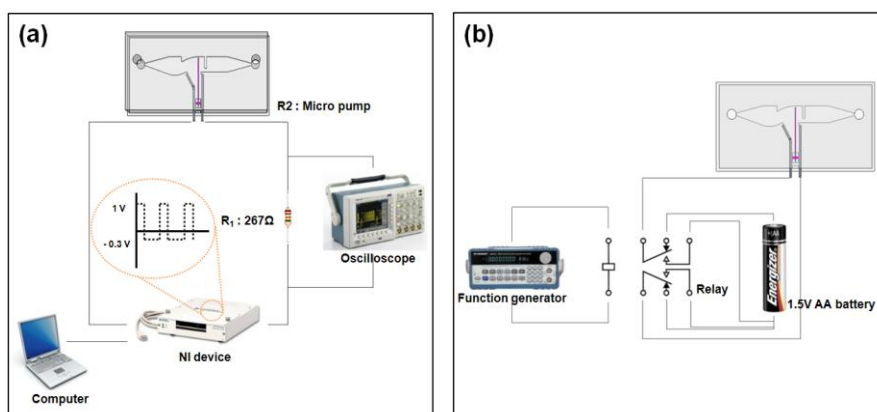

Fig. S3. The three geometries used to model the pressure distribution of the electrically-driven hydrogel valveless micropump: (a) model 1, (b) model 2 (with weir), and (c) model 3 (with weir and stop post).

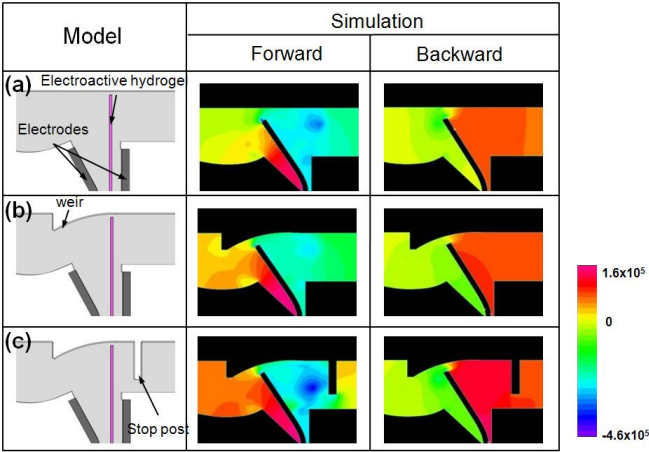

Fig. S4. Graph showing the time evolution of the actuation stroke, an indicator of electroactive hydrogel durability. The strip dimensions were 4 mm in length, 50  $\mu\text{m}$  in width, and 300  $\mu\text{m}$  in thickness. The error bars indicate the standard deviation from 6 trials.

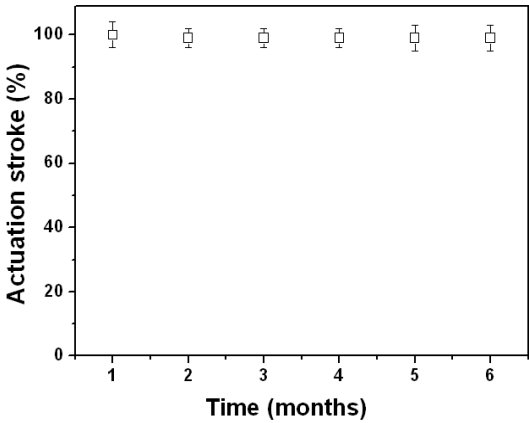

Fig. S5. Morphological changes of the MCF-7 human breast cancer cell line after anti-cancer drug treatment. MCF-7 cells were treated with adriamycin (50  $\mu\text{g}/\text{mL}$ ) for 24 h, and the morphological changes in the cells were monitored using an inverted microscope. (a) No adriamycin treatment group and (b) adriamycin-treated group.

The majority of cells were floating and had irregular cell walls. Some cell debris was present in the medium.  
The scale bars indicate 500  $\mu\text{m}$ .

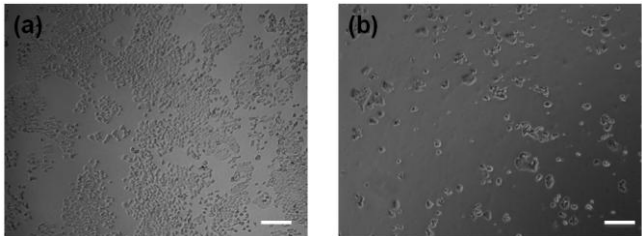

Fig. S6. Graph showing the energy consumption. Voltage as a function of time during continuous operation of the electroactive hydrogel micropump (using a standard 1.5 V AA battery). The error bars indicate the standard deviation (n=10).

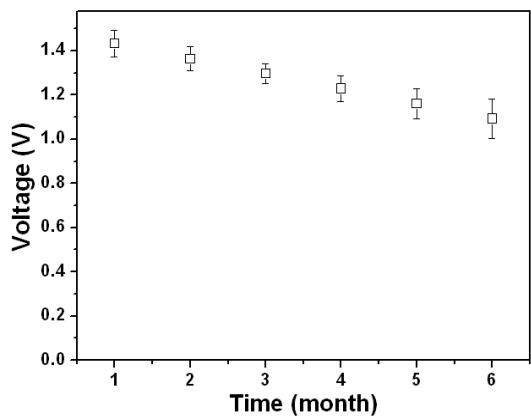

Comment [nineone1]: Referee #3  
10 question

Fig. S7. The time-varying force condition is imposed to the solid domain.

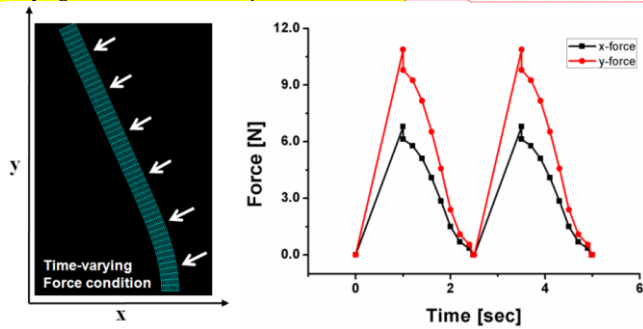

Comment [nineone2]: Referee #3  
2 question

Fig. S8. The bending angle of 4-HBA hydrogel as a function NaCl concentration at 9 V constant voltage. The strip dimensions were 4 mm in length, 50  $\mu\text{m}$  in width, and 300  $\mu\text{m}$  in thickness. The error bars indicate the standard deviation (n=5).

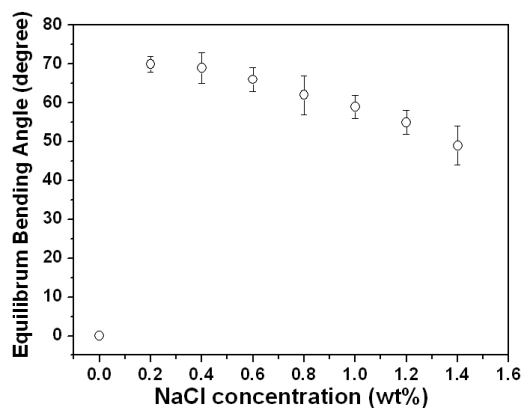

Comment [nineone3]: Refree #1  
6 question

Fig. S9. The pump driving system integrated with 1.5V button-type battery (alkaline, Fuji yama, Japan) and control system, and the proposed pumping system worked well with small button-type battery.

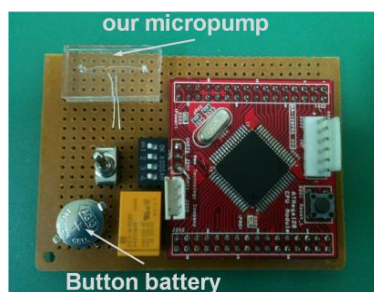

Supplement: c1lc20288j.pdf [file c1lc20288j.pdf]
